# Supplementary material for: A brand-new type of excited-state proton transfer (ESIPT) molecule based on sulfoxide/sulfenic acid tautomerism
Source: Royal Society of Chemistry journal article supplement (doi:10.1039/d3cp02624h), 2023-01-01
Supplement: d3cp02624h1.pdf [file d3cp02624h1.pdf]

A brand-new type of excited-state proton transfer (ESIPT) molecule  
based on sulfoxide/sulfenic acid tautomerism

Rongchuan Su\* and Zhenmei Huang

Rongchuan Su

Department of Pharmacology, North Sichuan Medical College, Nanchong, 637100, China

E-mail: srcxkai@nsmc.edu.cn

Zhenmei Huang

College of Chemistry, Sichuan University, Chengdu, Sichuan, 610064, China

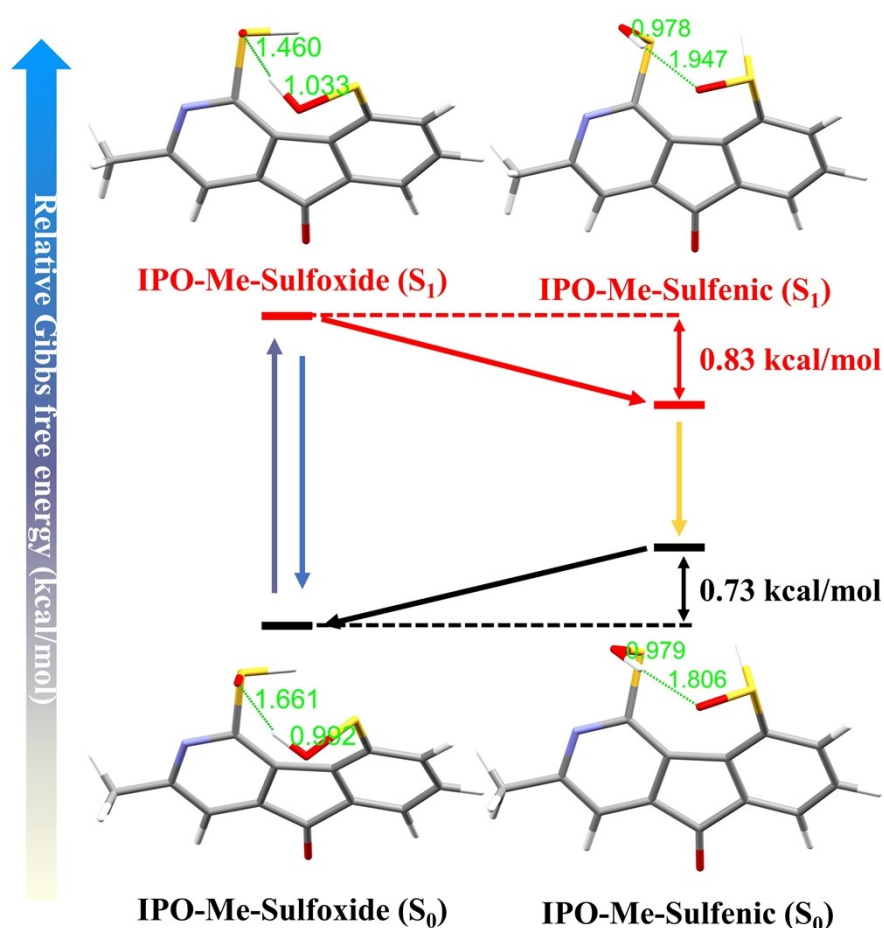

**Fig. S1.** The stable conformers for the ground state (bottom) and first excited singlet state (top) of IPO-Me were obtained by using the M06-2X/6-311++G(d,p) method in acetonitrile.

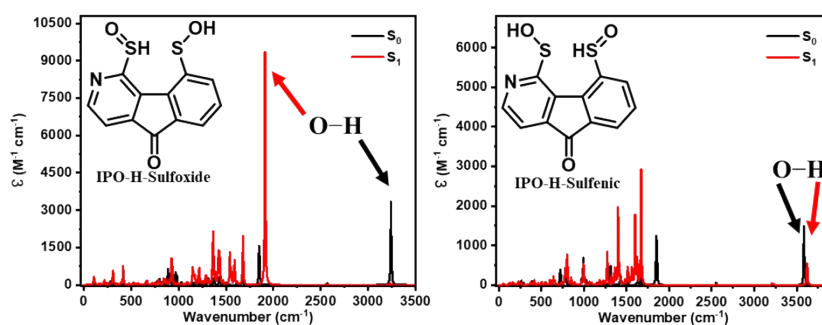

**Fig. S2.** The calculated infrared spectrum of IPO-H in the ground and first excited singlet states using the M06-2X/6-311++G(d,p) method in dichloromethane.

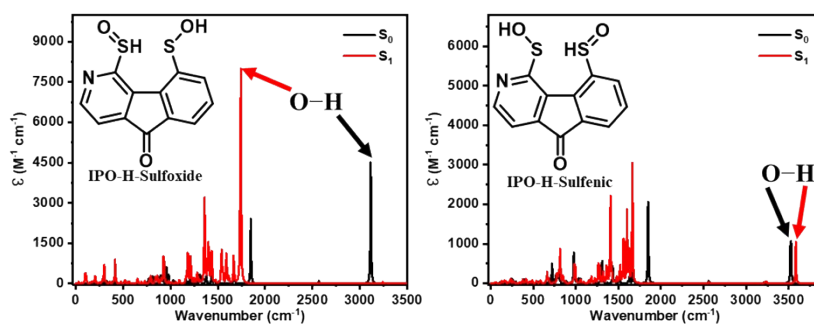

**Fig. S3.** The calculated infrared spectrum of IPO-H in the ground and first excited singlet states using the M06-2X/def2-TZVP method in acetonitrile.

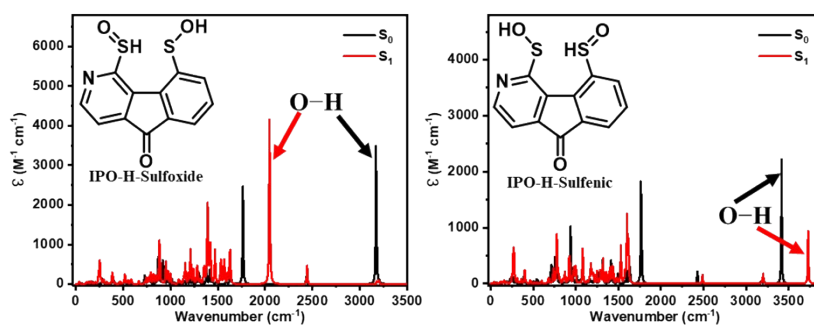

**Fig. S4.** The calculated infrared spectrum of IPO-H in the ground and first excited states using the B3LYP/6-311++G(d,p) method in acetonitrile.

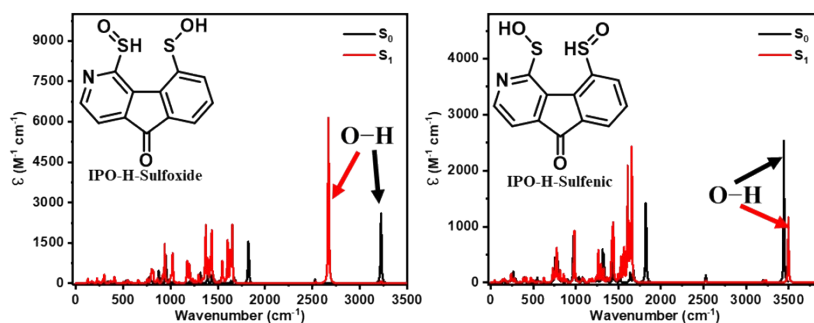

**Fig. S5.** The calculated infrared spectrum of IPO-H in the ground and first excited singlet states using the CAM-B3LYP/6-311++G(d,p) method in acetonitrile.

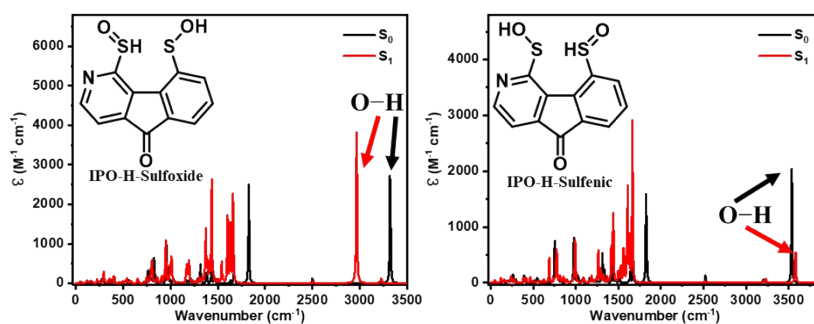

**Fig. S6.** The calculated infrared spectrum of IPO-H in the ground and first excited singlet states using the  $\omega$ B97X-D/6-311++G(d,p) method in acetonitrile.

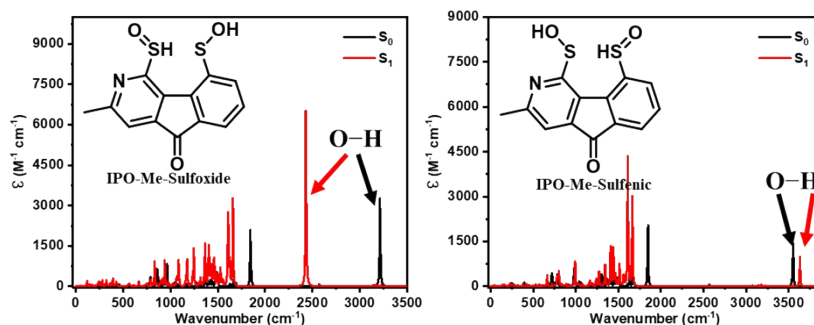

**Fig. S7.** The calculated infrared spectrum of IPO-Me in the ground and first excited singlet states using the M06-2X/6-311++G(d,p) method in acetonitrile.

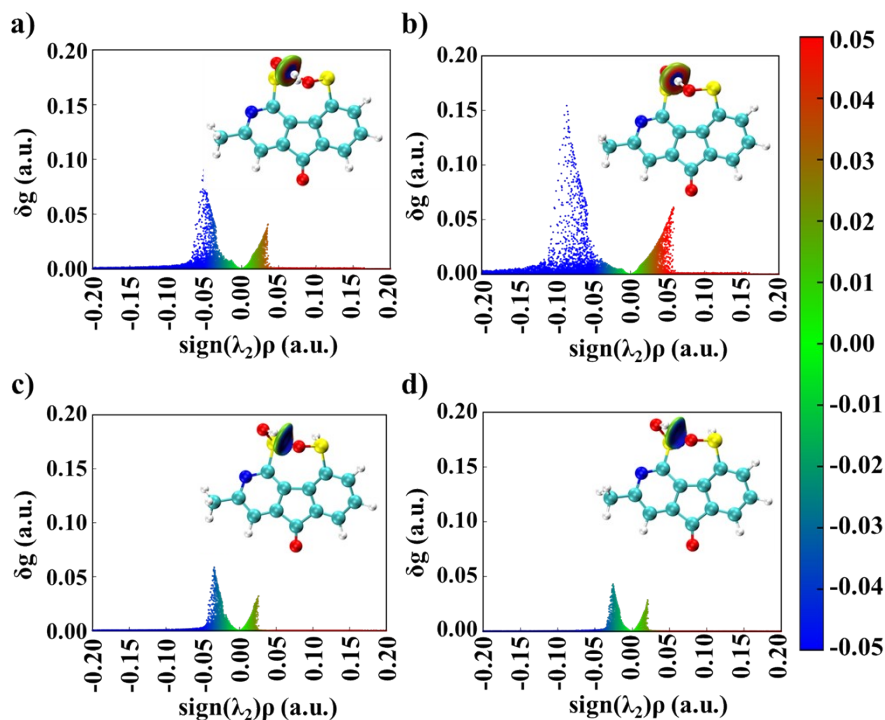

**Fig. S8.** The scatter plots of the  $\text{sign}(\lambda_2)\rho$  versus  $\delta g$  and isosurface density (inset) for the IPO-Me compounds at M06-2X/6-311++G(d,p) method in acetonitrile. The ground state (a), first excited singlet state (b) for IPO-Me-Sulfoxide and ground state (c), first excited singlet state (d) for IPO-Me-Sulfenic.

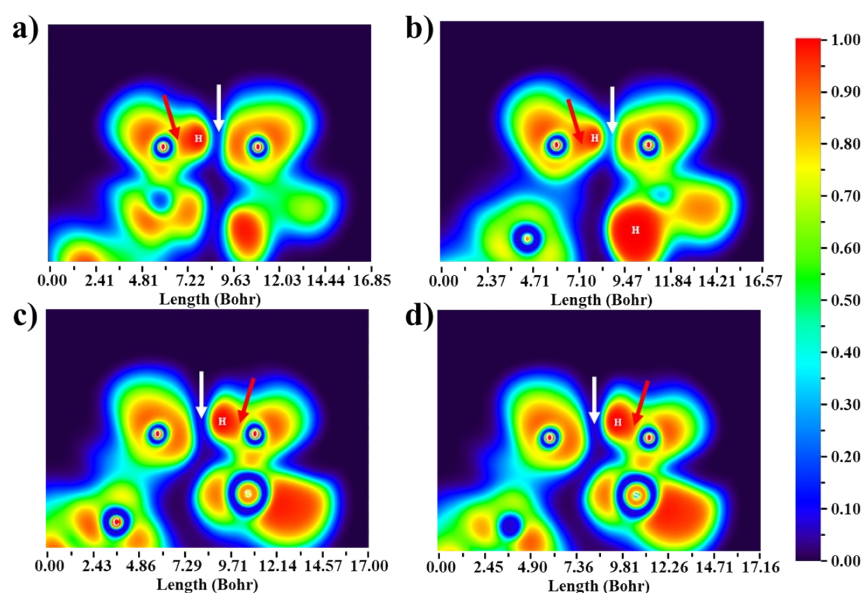

**Fig. S9.** ELF diagram of IPO-Me compounds in different electronic states at M06-2X/6-311++G(d,p) method in acetonitrile. The ground state (a), first excited singlet state (b) for IPO-Me-Sulfoxide and ground state (c), first excited singlet state (d) for IPO-Me-Sulfenic.

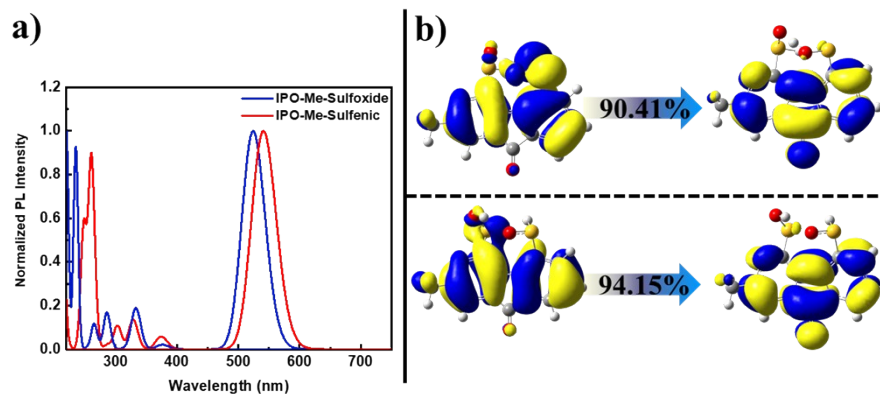

**Fig. S10.** Calculated (a) absorption, emission spectra ( $S_1 \rightarrow S_0$ ), and (b) FMOs ( $S_1 \rightarrow S_0$ ) of IPO-Me-Sulfoxide (up) and IPO-Me-Sulfenic (bottom) with STEOM-CCSD/cc-pVQZ//M06-2X/6-311++G(d,p) in acetonitrile.

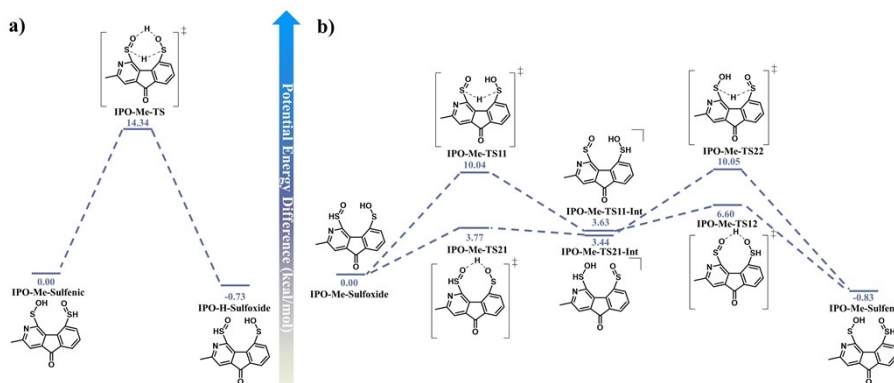

**Fig. S11.** The reactants, transition states, intermediates, and products of IPO-Me-Sulfoxide and IPO-Me-Sulfenic conversion in (a) ground state (CCSD/cc-pVQZ//M06-2X/6-311++G\*\* in acetonitrile) and (b) first excited singlet state (STEOM-CCSD/cc-pVQZ//M06-2X/6-311++G\*\* in acetonitrile).

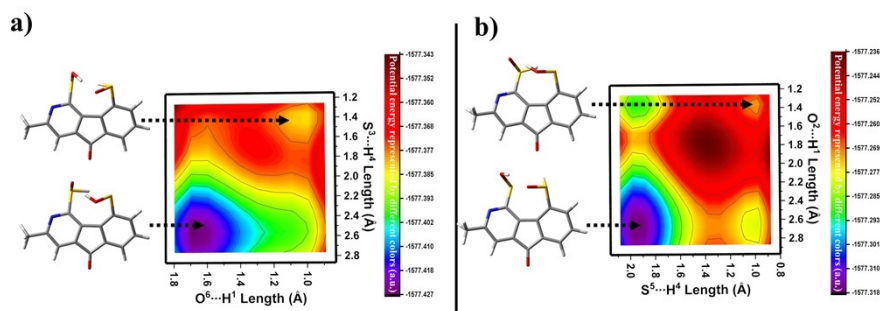

**Fig. S12.** Potential energy surfaces and corresponding structure of IPO-Me compounds with M06-2X/6-311++G(d,p) method in acetonitrile at (a) ground state and (b) first excited singlet state compounds with M06-2X/6-311++G(d,p) method in acetonitrile at (a) ground state and (b) first excited singlet state. 3D potential energy surface (left) and its corresponding planar projection (right).

**Table S1.** The S–O···H and S=O···H bond length of IPO-Me at the ground and first excited singlet states with M06-2X/6-311++G(d,p) method in acetonitrile.

| Molecule         | State          | S–O···H (Å) | S=O···H (Å) |
|------------------|----------------|-------------|-------------|
| IPO-Me-Sulfoxide | S <sub>0</sub> | 0.992       | 1.661       |
|                  | S <sub>1</sub> | 1.033       | 1.460       |
| IPO-Me-Sulfenic  | S <sub>0</sub> | 0.979       | 1.806       |
|                  | S <sub>1</sub> | 0.978       | 1.947       |

**Table S2.** Calculated absorption ( $\lambda_{\text{abs}}$ ), vertical emission wavelength ( $\lambda_{\text{em}}$ , S<sub>1</sub> → S<sub>0</sub>), stokes shift ( $\Delta\bar{\nu}$ ), oscillator strengths ( $f$ ), charge transfer percentage (CTP) main transition orbital composition, and molecular orbital configuration coefficient (CI) of IPO-Me-Sulfoxide and IPO-Me-Sulfenic with STEOM-CCSD/cc-pVQZ//M06-2X/6-311++G(d,p) in acetonitrile.

| Molecule        | $\lambda_{\text{ex}}$ (nm) | $f_{\text{ex}}$ | $\lambda_{\text{em}}$ (nm) | $f_{\text{em}}$ | $\Delta\lambda$ (cm <sup>-1</sup> ) | CI (S <sub>1</sub> → S <sub>0</sub> ) | CTP (%) |
|-----------------|----------------------------|-----------------|----------------------------|-----------------|-------------------------------------|---------------------------------------|---------|
| IPO-H-Sulfoxide | 376.33                     | 0.0041          |                            |                 |                                     |                                       |         |
|                 | 333.15                     | 0.0361          |                            |                 |                                     |                                       |         |
|                 | 285.78                     | 0.0326          | 524.37                     | 0.0454          | 7501.92                             | HOMO-LUMO:90.41%                      | 38.73   |
|                 | 264.84                     | 0.0223          |                            |                 |                                     |                                       |         |
| IPO-H-Sulfenic  | 235.03                     | 0.1788          |                            |                 |                                     |                                       |         |
|                 | 374.62                     | 0.0104          |                            |                 |                                     |                                       |         |
|                 | 328.65                     | 0.0281          | 541.15                     | 0.0294          | 8214.55                             | HOMO-LUMO:94.15%                      | 30.97   |
|                 | 303.10                     | 0.0227          |                            |                 |                                     |                                       |         |

---

259.41 0.1538

---

**Table S3.** Calculated gibbs free energy(kcal/mol) of transition state with CASSCF in acetonitrile.

| Molecule         | Ground state | Excited state         |          |                       |          |
|------------------|--------------|-----------------------|----------|-----------------------|----------|
|                  |              | Path one <sup>a</sup> |          | Path two <sup>b</sup> |          |
|                  |              | Step one              | Step two | Step one              | Step two |
| IPO-H-Sulfoxide  | 24.12        | 18.90                 | 10.06    | 9.44                  | 3.96     |
| IPO-Me-Sulfoxide | 21.27        | 19.75                 | 16.75    | 12.29                 | 10.70    |

<sup>a</sup> path one: break the S<sup>5</sup>-H<sup>4</sup> bond, form S<sup>3</sup>-H<sup>4</sup> firstly and break the O<sup>2</sup>-H<sup>1</sup> bond, form O<sup>6</sup>-H<sup>1</sup> secondly, <sup>b</sup> path two: break the O<sup>2</sup>-H<sup>1</sup> bond, form O<sup>6</sup>-H<sup>1</sup> firstly and break the S<sup>5</sup>-H<sup>4</sup> bond, form S<sup>3</sup>-H<sup>4</sup> secondly.
